# Supplementary material for: Antimicrobial Activity of Ibuprofen against Cystic Fibrosis-Associated Gram-Negative Pathogens
Source: PubMed Central journal article supplement (PMC5826130; doi:10.1128/aac.01574-17), 2018-02-23
Supplement: AAC.01574-17_zac003186949s1.pdf [file AAC.01574-17_zac003186949s1.pdf]

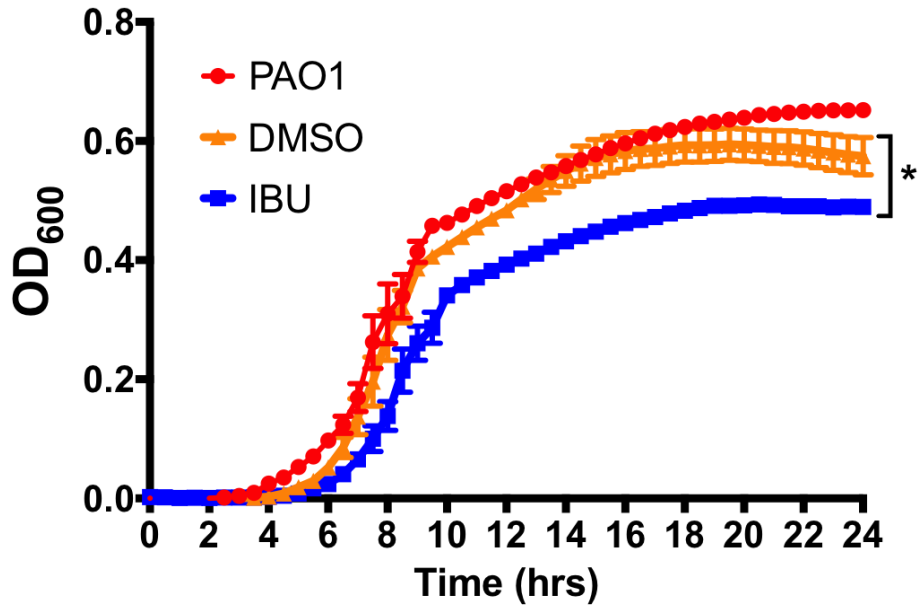

**Supplementary Figure** – Ibuprofen reduces the bacterial growth rate of *P. aeruginosa* strain PAO1 cultured rich media. PAO1 was grown at 37°C in MH broth in the presence of ibuprofen (IBU) (100 µg/mL) over a 24-hour period and OD<sub>600</sub> was determined at 30 minute intervals. Controls included un-inoculated growth media (not shown), growth medium with bacteria alone, and growth medium containing DMSO (5% v/v) without ibuprofen (0 µg/mL) inoculated with bacteria. Each dataset represents the mean of 2 independent experiments, each with 4 technical replicates (total 8 replicates per treatment) and data are presented as mean ± standard error. \* indicates  $P < 0.05$ , where a paired t-test was used to analyze the differences in end-point OD<sub>600</sub> for the growth curve.
